# Supplementary material for: Two Ni/Ce complexes based on bicompartmental ligands with field supported slow magnetic relaxation
Source: Royal Society of Chemistry journal article supplement (doi:10.1039/d4nj03545c), 2024-01-01
Supplement: d4nj03545c1.pdf [file d4nj03545c1.pdf]

## Supplementary information

### Two Ni/Ce complexes based on bicompartamental ligands with field supported slow magnetic relaxation

Lenka Krešáková<sup>a</sup>, Miroslava Litecká<sup>b</sup>, Itziar Oyarzabal<sup>c,d</sup>, Ján Titiš<sup>e</sup>, Michaela Červeňáková<sup>e</sup>  
Elizabeth Hillard<sup>f</sup>, Jerome Robert<sup>g</sup>, Juraj Černák<sup>\*a</sup>

<sup>a</sup>*Department of Inorganic Chemistry, Faculty of Science, P. J. Šafárik University in Košice, Moyzesova 11, 041 54 Košice, Slovakia*

<sup>b</sup>*Department of Materials Chemistry, Institute of Inorganic Chemistry of the Czech Academy of Sciences, Husinec-Řež, 25068 Řež, Czech Republic*

<sup>c</sup>*BCMaterials - Basque Center for Materials, Applications and Nanostructures, UPV/EHU Science Park, 48940 Leioa, Spain*

<sup>d</sup>*IKERBASQUE, Basque Foundation for Science, 48009 Bilbao, Spain*

<sup>e</sup>*Department of Chemistry, Faculty of Natural Sciences, University of SS Cyril and Methodius Nám. J. Herdu 2, 91701 Trnava, Slovakia*

<sup>f</sup>*Univ. Bordeaux, CNRS, Bordeaux INP, ICMCB, UMR 5026, F-33600 Pessac, France*

<sup>g</sup>*Université de Strasbourg, CNRS, Institut de Physique et Chimie des Matériaux de Strasbourg (IPCMS), UMR 7504, F-67000 Strasbourg, France*

*\*Correspondence e-mail: [juraj.cernak@upjs.sk](mailto:juraj.cernak@upjs.sk)*

#### **Analytical data**

##### **H<sub>2</sub>(*o-van-dap*)**

Anal. [%], calculated for C<sub>19</sub>H<sub>22</sub>N<sub>2</sub>O<sub>4</sub>: C, 66.65; H, 6.48; N, 8.18; found: C, 67.01; H, 6.48; N, 8.23.

FT-IR (cm<sup>-1</sup>): 3054w, 2993w, 2962w, 2937w, 2900w, 2834w, 2595br, 1623s, 1471m, 1461s, 1422m, 1345w, 1329w, 1252s, 1170m, 1139m, 1078s, 1039m, 998w, 967m, 937w, 913w, 873w, 838s, 776s, 731s, 636m, 615w, 590w, 572w, 604w, 440m, 416w.

<sup>1</sup>H NMR (ppm): 1.32d (3H); 3.74s (5H); 3.76s (3H); 3.78m (1H); 6.79q (2H); 6.98dd (1H); 7.00m (1H); 7.03d (2H); 8.54s (1H); 8.56s (1H); 13.57s (OH); 13.59s (OH).

<sup>13</sup>C NMR (ppm): 19.9 (CHCH<sub>3</sub>); 55.5 (OCH<sub>3</sub>); 55.7 (OCH<sub>3</sub>); 63.4 (CHCH<sub>3</sub>); 64.1 (CHCN); 114.8 (ArC3); 117.8 (ArC4); 117.9 (ArC5); 118.2 (ArC6); 118.3 (ArC5); 123.1 (ArC6); 123.2 (ArC4); 147.9 (ArC1-OCH<sub>3</sub>); 148.0 (ArC18-OCH<sub>3</sub>). 151.2 (ArC7-OH); 151.5 (ArC16OH); 165.3 (C=N); 167.1 (C=N).

**H<sub>2</sub>(*o-van-dmdap*)**

Anal. [%], calculated for C<sub>21</sub>H<sub>26</sub>N<sub>2</sub>O<sub>4</sub>: C, 68.09; H, 7.07; N, 7.56; found: C, 68.44; H, 7.18; N, 7.46.

FT-IR (cm<sup>-1</sup>): 3077w, 3005w, 2956w, 2890w, 2588br, 1626s, 1469s, 1458s, 1440m, 1418m, 1393w, 1372w, 1338m, 1286w, 1268w, 1247s, 1167m, 1154w, 1077m, 1037s, 974m, 966w, 920w, 870m, 840m, 835w, 782s, 740s, 727s, 636m, 580w, 565w, 548w, 535w, 503, 438w, 416w.

<sup>1</sup>H NMR (ppm): 0.99s (3H); 3.49d (1H); 3.78d (3H); 6.81td (1H); 7.02m (1H); 7.05m (1H); 8.53s (2H); 13.88s (OH).

<sup>13</sup>C NMR (ppm): 23.6 (CCH<sub>3</sub>); 35.8 (CCH<sub>3</sub>); 55.7 (OCH<sub>3</sub>); 66.6 (NCH<sub>2</sub>); 114.7 (ArC3); 117.8 (ArC4); 118.3 (ArC6); 123.2 (ArC5); 148.0 (ArC1-OCH<sub>3</sub>); 151.7 (ArC7-OH); 166.8 (C=N).

**[Ni(*o-van-dap*)Ce(H<sub>2</sub>O)(NO<sub>3</sub>)<sub>3</sub>](1)**

Anal [%], calculated for C<sub>19</sub>H<sub>22</sub>N<sub>5</sub>O<sub>14</sub>NiCe: C, 30.71; H, 2.98; N, 9.42; found: C, 31.02; H, 3.19; N, 9.27.

FT-IR (cm<sup>-1</sup>) (1): 3396br, 2988w, 2953w, 2851w, 1627m, 1608m, 1561w, 1504m, 1471s, 1459s, 1440s, 1407m, 1398m, 1334m, 1314m, 1288s, 1250s, 1233s, 1204w, 1170m, 1126w, 1099w, 1078m, 1049w, 1032m, 968m, 945w, 883w, 856m, 816m, 786m, 737s, 684w, 665w, 637w, 626w, 585w, 546w, 530w, 489w, 472w, 441w, 416w.

**[Ni(H<sub>2</sub>O)<sub>2</sub>(*o-van-dmdap*)Ce(NO<sub>3</sub>)<sub>3</sub>] (2)**

Anal [%], calculated for C<sub>21</sub>H<sub>28</sub>N<sub>5</sub>O<sub>15</sub>NiCe: C, 31.96; H, 3.58; N, 8.87; found: C, 31.73; H, 3.29; N, 8.80.

FT-IR (cm<sup>-1</sup>) (2): 3502m, 3427m, 2996w, 2949w, 1644m, 1630s, 1606m, 1561w, 1506m, 1491m, 1459s, 1453s, 1409m, 1391m, 1369w, 1325m, 1289s, 1240w, 1219s, 1168w, 1105w, 1066s, 1050w, 1024s, 1003w, 968m, 927m, 903w, 881w, 849m, 815w, 799w, 786w, 779w, 745m, 734s, 643m, 613w, 565w, 551w, 537w, 477m, 454w, 443w, 429w, 406w.

**Table S1** Ni/Ce heterobimetallic complexes based on bicompartamental Schiff base type ligands derived from *o*-vanillin (or its derivatives) and various diamines, with known crystal structures.

| Complex/<br>Refcode, Reference                                                                                                                                                                                                                                 | Chromophore                                                                                                        | Ni...Ce<br>distance [Å] | Magnetism,<br>type of interaction                    |
|----------------------------------------------------------------------------------------------------------------------------------------------------------------------------------------------------------------------------------------------------------------|--------------------------------------------------------------------------------------------------------------------|-------------------------|------------------------------------------------------|
| <b><i>NiCe dinuclear complexes</i></b>                                                                                                                                                                                                                         |                                                                                                                    |                         |                                                      |
| [Ni( <i>o</i> -van-en)CeCl <sub>3</sub> (H <sub>2</sub> O)]<br>BORDOE [1]                                                                                                                                                                                      | {NiO <sub>2</sub> N <sub>2</sub> } (D <sub>4h</sub> )<br>{CeO <sub>5</sub> Cl <sub>3</sub> }                       | 3.41                    | field induced<br>SMM,<br>NI                          |
| [(MeCN) <sub>2</sub> Ni( <i>o</i> -van-pn)Ce(NO <sub>3</sub> ) <sub>3</sub> (H <sub>2</sub> O)]<br>[(MeCN)(H <sub>2</sub> O)Ni( <i>o</i> -van-pn)<br>Ce(NO <sub>3</sub> ) <sub>2</sub> (H <sub>2</sub> O) <sub>2</sub> ](NO <sub>3</sub> )·2MeCN<br>IWUSOJ [2] | {NiO <sub>2</sub> N <sub>4</sub> } (O <sub>h</sub> )<br>{NiO <sub>3</sub> N <sub>3</sub> }<br>{CeO <sub>10</sub> } | 3.61                    | DC,<br>AF,<br>not measured                           |
| [Ni( <i>o</i> -evan-trans-dach)<br>Ce(H <sub>2</sub> O)(NO <sub>3</sub> ) <sub>3</sub> ]<br>MABMOT [3]                                                                                                                                                         | {NiO <sub>2</sub> N <sub>2</sub> } (D <sub>4h</sub> )<br>{CeO <sub>11</sub> }                                      | 3.57                    | DC,<br>NI                                            |
| [(MeCN) <sub>2</sub> Ni( <i>o</i> -van-pn)Ce(NO <sub>3</sub> ) <sub>3</sub> ]<br>NOVMIW [4]                                                                                                                                                                    | {NiO <sub>2</sub> N <sub>4</sub> } (O <sub>h</sub> )<br>{CeO <sub>10</sub> }                                       | 3.56                    | –                                                    |
| [Ni( <i>o</i> -van-dach)Ce(H <sub>2</sub> O)(NO <sub>3</sub> ) <sub>3</sub> ]<br>QULYED [5]                                                                                                                                                                    | {NiO <sub>2</sub> N <sub>2</sub> } (D <sub>4h</sub> )<br>{CeO <sub>11</sub> }                                      | 3.35                    | DC,<br>NI                                            |
| [Ni( <i>o</i> -evan-en)Ce(NO <sub>3</sub> ) <sub>3</sub> ]<br>SAQCOD [6]                                                                                                                                                                                       | {NiO <sub>2</sub> N <sub>2</sub> } (D <sub>4h</sub> )<br>{CeO <sub>10</sub> }                                      | 3.49                    | DC,<br>NI                                            |
| <b><i>Ni<sub>2</sub>Ce trinuclear complexes</i></b>                                                                                                                                                                                                            |                                                                                                                    |                         |                                                      |
| [(Ni( <i>o</i> -van-en)) <sub>2</sub><br>Ce(NO <sub>3</sub> ) <sub>2</sub> (H <sub>2</sub> O)](NO <sub>3</sub> )<br>MEFYAA [7]                                                                                                                                 | {NiO <sub>2</sub> N <sub>2</sub> } (D <sub>4h</sub> )<br>{CeO <sub>12</sub> }                                      | 3.50                    | –                                                    |
| [(Ni( <i>o</i> -hap-pn)) <sub>2</sub> Ce(NO <sub>3</sub> ) <sub>3</sub> ]<br>PABWEX [8]                                                                                                                                                                        | {NiO <sub>2</sub> N <sub>2</sub> } (D <sub>4h</sub> )<br>{CeO <sub>10</sub> }                                      | 3.44, 3.33              | –                                                    |
| [(Ni(MeOH)( <i>Br</i> - <i>o</i> -van-en)) <sub>2</sub><br>Ce(OAc) <sub>2</sub> NO <sub>3</sub> ·4H <sub>2</sub> O<br>SIVLIU [9]                                                                                                                               | {NiO <sub>4</sub> N <sub>2</sub> } (O <sub>h</sub> )<br>{CeO <sub>10</sub> }                                       | 3.57                    | DC,<br>AF<br>( <i>J</i> = -1.1(4) cm <sup>-1</sup> ) |
| [(Ni( <i>o</i> -evan-en)) <sub>2</sub> Ce(NO <sub>3</sub> ) <sub>2</sub> ](NO <sub>3</sub> )<br>XAPVER [10]                                                                                                                                                    | {NiO <sub>2</sub> N <sub>2</sub> } (D <sub>4h</sub> )<br>{CeO <sub>10</sub> }                                      | 3.53, 3.57              | –                                                    |
| <b><i>Tetranuclear complexes Ni<sub>3</sub>Ce core</i></b>                                                                                                                                                                                                     |                                                                                                                    |                         |                                                      |
| [(Ni( <i>o</i> -van-dach)) <sub>3</sub> Ce(OAc) <sub>2</sub> ](OAc)<br>·H <sub>2</sub> O<br>OBOGUL [11]                                                                                                                                                        | {NiO <sub>2</sub> N <sub>2</sub> } (D <sub>4h</sub> )<br>{CeO <sub>10</sub> }                                      | 3.57, 3.58, 3.60        | –                                                    |
| [(Ni( <i>o</i> -van-en)) <sub>3</sub> Ce(OAc) <sub>2</sub> ](OAc)<br>OBOHEW [11]                                                                                                                                                                               | {NiO <sub>2</sub> N <sub>2</sub> } (D <sub>4h</sub> )<br>{CeO <sub>10</sub> }                                      | 3.55, 3.56, 3.58        | –                                                    |

\* *pn* = 1,3-diaminopropane; *o*-evan = 3-ethoxysalicylaldehyde/*o*-ethylvanillin; *trans*-dach = *trans*-1,2-diaminocyclohexane; *o*-hap = *o*-hydroxyacetophenone; *dach* = 1,2-diaminocyclohexane; *Br*-*o*-van = 5-bromo-*o*-vanillin; DC/AC measurements, AF = antiferromagnetic interaction, F = ferromagnetic interaction, NI = no interaction, SMM = single molecule magnet

## Structural data

**Table S2** Crystal data and structure refinements for **1** and **2**.

|                                                | <b>1</b>                                                           | <b>2</b>                                                           |
|------------------------------------------------|--------------------------------------------------------------------|--------------------------------------------------------------------|
| Empirical formula                              | C <sub>19</sub> H <sub>22</sub> N <sub>5</sub> NiCeO <sub>14</sub> | C <sub>21</sub> H <sub>28</sub> N <sub>5</sub> NiCeO <sub>15</sub> |
| Molecular weight                               | 743.24                                                             | 789.31                                                             |
| Crystal system                                 | Triclinic                                                          | Monoclinic                                                         |
| Space group                                    | <i>P</i> -1                                                        | <i>P</i> 2 <sub>1</sub>                                            |
| Temperature (K)                                | 100(2)                                                             | 100(2)                                                             |
| Cell parameters                                |                                                                    |                                                                    |
| <i>a</i> (Å)                                   | 7.8894(2)                                                          | 8.8746(10)                                                         |
| <i>b</i> (Å)                                   | 11.3473(2)                                                         | 16.0480(2)                                                         |
| <i>c</i> (Å)                                   | 14.4942(2)                                                         | 10.0771(10)                                                        |
| $\alpha$ (°)                                   | 93.723(10)                                                         | 90                                                                 |
| $\beta$ (°)                                    | 92.398(2)                                                          | 91.844(10)                                                         |
| $\gamma$ (°)                                   | 101.789(2)                                                         | 90                                                                 |
| <i>V</i> (Å <sup>3</sup> )                     | 1265.50(4)                                                         | 1434.43(3)                                                         |
| <i>Z</i>                                       | 2                                                                  | 2                                                                  |
| <i>D</i> <sub>calc</sub> (Mg.m <sup>-3</sup> ) | 1.951                                                              | 1.827                                                              |
| Abs. coeff. (mm <sup>-1</sup> )                | 15.378                                                             | 13.635                                                             |
| Crystal colour, form                           | orange block                                                       | green prism                                                        |
| Crystal size (mm)                              | 0.092 x 0.081 x 0.058                                              | 0.460 x 0.400 x 0.210                                              |
| Radiation (Å)                                  | CuK $\alpha$ ( $\lambda$ = 1.54184)                                | CuK $\alpha$ ( $\lambda$ = 1.54184)                                |
| $\theta$ range (°)                             | 3.060 – 67.490                                                     | 4.390 – 77.891                                                     |
|                                                | -9 ≤ <i>h</i> ≤ 9                                                  | -9 ≤ <i>h</i> ≤ 11                                                 |
| Index ranges                                   | -12 ≤ <i>k</i> ≤ 13                                                | -20 ≤ <i>k</i> ≤ 19                                                |
|                                                | -17 ≤ <i>l</i> ≤ 15                                                | -11 ≤ <i>l</i> ≤ 12                                                |
| Refl. coll./ indep.                            | 14635/4559                                                         | 13419 /5473                                                        |
| Goodness-of-fit ( <i>F</i> <sup>2</sup> )      | 1.111                                                              | 1.028                                                              |
| Final <i>R</i> indices                         | <i>R</i> 1 = 0.0444                                                | <i>R</i> 1 = 0.0621                                                |
| ( <i>I</i> > 2 $\sigma$ ( <i>I</i> ))          | w <i>R</i> 2 = 0.1230                                              | w <i>R</i> 2 = 0.1577                                              |
| <i>R</i> indices (all data)                    | <i>R</i> 1 = 0.0452                                                | <i>R</i> 1 = 0.0622                                                |
|                                                | w <i>R</i> 2 = 0.1237                                              | w <i>R</i> 2 = 0.1580                                              |
| Diff. peak and hole (e.Å <sup>-3</sup> )       | -1.674 ≤ $\Delta\rho$ ≤ 2.502                                      | -2.320 ≤ $\Delta\rho$ ≤ 3.225                                      |

**Table S3** Results of the *SHAPE* [12] calculations defining the polyhedra shape of Ce(III) ions in complexes **1** and **2**.

| Polyhedron shape | Probability for <b>1</b> | Polyhedron shape | Probability for <b>2</b> |
|------------------|--------------------------|------------------|--------------------------|
| JASPC-11         | 5.198                    | HD-10            | 7.063                    |
| JAPPR-11         | 10.759                   | TD-10            | 4.336                    |
| <b>JCPAPR-11</b> | <b>3.204</b>             | SDD-10           | 4.342                    |
| JCPPR-11         | 8.704                    | <b>JSPC-10</b>   | <b>2.951</b>             |
| EBPY-11          | 17.375                   | JATDI-10         | 17.896                   |
| DPY-11           | 25.712                   | JMBIC-10         | 7.600                    |
| HP-11            | 36.421                   | JBCSAPR-10       | 6.265                    |
|                  |                          | JBCCU-10         | 10.473                   |
|                  |                          | PAPR-10          | 10.318                   |
|                  |                          | PPR-10           | 9.211                    |
|                  |                          | OBPY-10          | 16.777                   |
|                  |                          | EPY-10           | 22.848                   |
|                  |                          | DP-10            | 35.651                   |

|           |                                 |            |                                       |
|-----------|---------------------------------|------------|---------------------------------------|
| JASPC-11  | Augmented sphenocorona J87      | HD-10      | Hexadecahedron (2:6:2) or (1:4:4:1)   |
| JAPPR-11  | Augmented pentagonal prism J52  | TD-10      | Tetradecahedron (2:6:2)               |
| JCPAPR-11 | Capped pentagonal antiprism J11 | SDD-10     | Staggered Dodecahedron (2:6:2)        |
| JCPPR-11  | Capped pentagonal prism J9      | JSPC-10    | Sphenocorona J87                      |
| EBPY-11   | Enneagonal bipyramid            | JATDI-10   | Augmen. tridiminished icosahedron J64 |
| DPY-11    | Decagonal pyramid               | JMBIC-10   | Metabidiminished icosahedron J62      |
| HP-11     | Hendecagon                      | JBCSAPR-10 | Bicapped square antiprism J17         |
|           |                                 | JBCCU-10   | Bicapped cube J15                     |
|           |                                 | PAPR-10    | Pentagonal antiprism                  |
|           |                                 | PPR-10     | Pentagonal prism                      |
|           |                                 | OBPY-10    | Octagonal bipyramid                   |
|           |                                 | EPY-10     | Enneagonal pyramid                    |
|           |                                 | DP-10      | Decagon                               |

**Table S4** Potential hydrogen bonding interactions in **1** [ $\text{\AA}$ ,  $^\circ$ ].

| <b>D-H...A</b>                           | <b>d(D-H)</b>  | <b>d(H...A)</b>            | <b>d(D...A)</b>           | <b>&lt;(DHA)</b>           |                 |
|------------------------------------------|----------------|----------------------------|---------------------------|----------------------------|-----------------|
| O14-H14A...O13 <sup>i</sup>              | 0.84(7)        | 2.06(7)                    | 2.816 (6)                 | 149(7)                     |                 |
| O14-H14B...O10 <sup>i</sup>              | 0.84(6)        | 2.13(7)                    | 2.959 (7)                 | 170(8)                     |                 |
| C3-H3...O6 <sup>ii</sup>                 | 0.95           | 2.59                       | 3.407(7)                  | 144                        |                 |
| C5-H5...O13 <sup>iii</sup>               | 0.95           | 2.50                       | 3.369(7)                  | 153                        |                 |
| C8-H8...O13 <sup>iii</sup>               | 1.01(8)        | 2.48(7)                    | 3.421(7)                  | 154(6)                     |                 |
| C11-H11...O8 <sup>iv</sup>               | 0.89(8)        | 2.59(7)                    | 3.407(7)                  | 154(6)                     |                 |
| C15-H15...O7 <sup>v</sup>                | 0.95           | 2.41                       | 3.298(7)                  | 156                        |                 |
| <b><math>\pi</math>-<math>\pi</math></b> | <b>Cg...Cg</b> | <b><math>\alpha</math></b> | <b><math>\beta</math></b> | <b><math>\gamma</math></b> | <b>Slippage</b> |
| Cg1...Cg1 <sup>vi</sup>                  | 3.676(3)       | 0                          | 15.1                      | 15.1                       | 0.960           |
| Cg2...Cg2 <sup>vii</sup>                 | 3.629(3)       | 0                          | 20.8                      | 20.8                       | 1.290           |

Symmetry codes: i:  $-1 + x, y, z$ ; ii:  $1 - x, -y, -z$ ; iii:  $2 - x, 1 - y, -z$ ; iv:  $2 - x, 1 - y, 1 - z$ ; v:  $1 - x, -y, 1 - z$ ; vi:  $1 - x, 1 - y, 1 - z$ ; vii:  $1 - x, 1 - y, -z$ ; viii:  $1 + x, y, z$ . Cg1 is the centre of gravity of the aromatic ring formed by C12-C17 atoms, Cg2 is the centre of gravity of the aromatic ring formed by C2-C7 atoms.

**Table S5** Potential hydrogen bonding interactions in **2** [ $\text{\AA}$ ,  $^\circ$ ].

| <b>D-H...A</b>               | <b>d(D-H)</b> | <b>d(H...A)</b> | <b>d(D...A)</b> | <b>&lt;(DHA)</b> |
|------------------------------|---------------|-----------------|-----------------|------------------|
| O14-H14B...O13 <sup>i</sup>  | 0.87          | 2.02            | 2.8194(1)       | 153              |
| O15-H15A...O6 <sup>ii</sup>  | 0.84          | 2.02            | 2.8410(1)       | 165              |
| O14-H14A...O9                | 0.87          | 2.01            | 2.7166(1)       | 139              |
| O15-H15B...O12               | 0.84          | 2.06            | 2.7807(1)       | 143              |
| C21-H21A...O9 <sup>ii</sup>  | 0.98          | 2.52            | 3.0883(1)       | 141              |
| C21-H21B...O10 <sup>iv</sup> | 0.98          | 2.57            | 3.5203(1)       | 163              |

Symmetry codes: i:  $x, y, -1 + z$ ; ii:  $1 + x, y, z$ ; iii:  $x, y, 1 + z$ ; iv:  $1 - x, -1/2 + y, 1 - z$ .

**Table S6.** Fitting parameters for **1** and **2** from Cole-Cole plots.

| Compound 1 |                                       |                                       |          | Compound 2 |                                       |                                       |          |
|------------|---------------------------------------|---------------------------------------|----------|------------|---------------------------------------|---------------------------------------|----------|
| T / K      | $\chi_s / \text{cm}^3\text{mol}^{-1}$ | $\chi_T / \text{cm}^3\text{mol}^{-1}$ | $\alpha$ | T / K      | $\chi_s / \text{cm}^3\text{mol}^{-1}$ | $\chi_T / \text{cm}^3\text{mol}^{-1}$ | $\alpha$ |
| <b>2</b>   | $2.61 \cdot 10^{-3}$                  | $2.17 \cdot 10^{-1}$                  | 0.27     | <b>2</b>   | $2.06 \cdot 10^{-1}$                  | $4.76 \cdot 10^{-1}$                  | 0.12     |
| <b>2.2</b> | $3.03 \cdot 10^{-3}$                  | $2.01 \cdot 10^{-1}$                  | 0.24     | <b>2.1</b> | $2.10 \cdot 10^{-1}$                  | $4.61 \cdot 10^{-1}$                  | 0.11     |
| <b>2.4</b> | $3.95 \cdot 10^{-3}$                  | $1.79 \cdot 10^{-1}$                  | 0.19     | <b>2.2</b> | $2.17 \cdot 10^{-1}$                  | $4.46 \cdot 10^{-1}$                  | 0.07     |
| <b>2.6</b> | $4.33 \cdot 10^{-3}$                  | $1.63 \cdot 10^{-1}$                  | 0.14     | <b>2.3</b> | $2.23 \cdot 10^{-1}$                  | $4.36 \cdot 10^{-1}$                  | 0.07     |
| <b>2.8</b> | $5.13 \cdot 10^{-3}$                  | $1.50 \cdot 10^{-1}$                  | 0.09     | <b>2.4</b> | $2.21 \cdot 10^{-1}$                  | $4.24 \cdot 10^{-1}$                  | 0.07     |
| <b>3</b>   | $5.31 \cdot 10^{-3}$                  | $1.37 \cdot 10^{-1}$                  | 0.06     | <b>2.5</b> | $2.24 \cdot 10^{-1}$                  | $4.14 \cdot 10^{-1}$                  | 0.06     |
| <b>3.2</b> | $5.38 \cdot 10^{-3}$                  | $1.30 \cdot 10^{-1}$                  | 0.06     | <b>2.6</b> | $2.29 \cdot 10^{-1}$                  | $4.03 \cdot 10^{-1}$                  | 0.05     |
| <b>3.4</b> | $5.25 \cdot 10^{-3}$                  | $1.22 \cdot 10^{-1}$                  | 0.04     | <b>2.7</b> | $2.23 \cdot 10^{-1}$                  | $3.95 \cdot 10^{-1}$                  | 0.05     |
| <b>3.6</b> | $5.89 \cdot 10^{-3}$                  | $1.16 \cdot 10^{-1}$                  | 0.03     | <b>2.8</b> | $2.30 \cdot 10^{-1}$                  | $3.86 \cdot 10^{-1}$                  | 0.05     |
| <b>3.8</b> | $4.86 \cdot 10^{-3}$                  | $1.11 \cdot 10^{-1}$                  | 0.05     | <b>2.9</b> | $2.29 \cdot 10^{-1}$                  | $3.78 \cdot 10^{-1}$                  | 0.06     |
| <b>4</b>   | $7.29 \cdot 10^{-3}$                  | $1.04 \cdot 10^{-1}$                  | 0.02     | <b>3</b>   | $2.30 \cdot 10^{-1}$                  | $3.70 \cdot 10^{-1}$                  | 0.05     |
| <b>4.2</b> | $5.36 \cdot 10^{-3}$                  | $9.99 \cdot 10^{-2}$                  | 0.05     | <b>3.1</b> | $2.32 \cdot 10^{-1}$                  | $3.63 \cdot 10^{-1}$                  | 0.04     |
| <b>4.4</b> | $7.05 \cdot 10^{-3}$                  | $9.52 \cdot 10^{-2}$                  | 0.04     | <b>3.2</b> | $2.30 \cdot 10^{-1}$                  | $3.56 \cdot 10^{-1}$                  | 0.05     |
| <b>4.6</b> | $4.98 \cdot 10^{-3}$                  | $9.12 \cdot 10^{-2}$                  | 0.01     |            |                                       |                                       |          |

**Table S7** Energies of the lowest Kramer doublets (KDs) for Ce(III) ion in **1** Ce-Ni calculated using single\_aniso module together with g-values, transition magnetic moments quantifying probability for the quantum tunnelling of magnetization (QTM) and deviations from the principal magnetisation axes of the first KD.

| KD | $\Delta E (\text{cm}^{-1})$ | $g_{xx}$ | $g_{yy}$ | $g_{zz}$ | QTM                | $\theta(^{\circ})$ |
|----|-----------------------------|----------|----------|----------|--------------------|--------------------|
| 1  | 0                           | 0.223    | 1.126    | 3.333    | 0.224977068171E+00 | -                  |
| 2  | 106.97                      | 2.547    | 1.896    | 0.507    | 0.615069853095E+00 | 12.88              |
| 3  | 324.71                      | 0.035    | 0.637    | 3.247    | 0.381536894005E+00 | 12.65              |

**Table S8** Composition of wave functions of the ground  $J = 5/2$  state of Ce(III) ion for complex **1** Ce-Ni obtained from single\_aniso calculations.

| w.f. | $m_J$       | $c_i$                        |                              | Weight (%)  |
|------|-------------|------------------------------|------------------------------|-------------|
|      |             | Real                         | Imag                         |             |
| 1    | <b>-5/2</b> | <b>-0.74183073820615E-01</b> | <b>-0.91480515575970E+00</b> | <b>84.2</b> |
|      | -3/2        | -0.14133661484248E-01        | -0.55436599085241E-01        | 0.3         |
|      | -1/2        | +0.53733779491727E-01        | -0.13864707491421E-02        | 0.3         |
|      | 1/2         | +0.47487543187659E-01        | +0.29120008604358E+00        | 8.7         |
|      | 3/2         | -0.52741391074128E-01        | -0.16112330368879E+00        | 2.9         |
|      | 5/2         | +0.18886834063837E+00        | +0.00000000000000E+00        | 3.6         |
| 2    | -5/2        | -0.15265538573680E-01        | -0.18825039999798E+00        | 3.6         |
|      | -3/2        | -0.16485903530430E+00        | -0.39545825863510E-01        | 2.9         |
|      | -1/2        | -0.29408558176856E+00        | -0.23795534967872E-01        | 8.7         |
|      | 1/2         | +0.29611708972751E-02        | +0.53670037520356E-01        | 0.3         |
|      | 3/2         | +0.56397594174211E-01        | +0.96066789148342E-02        | 0.3         |
|      | <b>5/2</b>  | <b>-0.91780804153727E+00</b> | <b>+0.00000000000000E+00</b> | <b>84.2</b> |
| 3    | -5/2        | +0.62723504566254E-01        | -0.44755280425052E-01        | 0.6         |
|      | <b>-3/2</b> | <b>-0.60098141078592E+00</b> | <b>-0.52740925286143E+00</b> | <b>63.9</b> |
|      | -1/2        | -0.33425018297691E+00        | +0.27092546389582E+00        | 18.5        |
|      | 1/2         | +0.20714018235646E-01        | -0.23619144843819E+00        | 5.6         |
|      | 3/2         | -0.12363228640505E+00        | +0.22305120926588E+00        | 6.5         |
|      | 5/2         | +0.21988065823111E+00        | +0.00000000000000E+00        | 4.8         |
| 4    | -5/2        | +0.17898796305026E+00        | -0.12771379159541E+00        | 4.8         |
|      | -3/2        | +0.23019490167215E+00        | +0.10975924007131E+00        | 6.5         |
|      | -1/2        | +0.15404931625927E+00        | +0.18023395506330E+00        | 5.6         |
|      | 1/2         | +0.42944967876827E+00        | +0.26396318861445E-01        | 18.5        |
|      | <b>3/2</b>  | <b>-0.18287649770761E+00</b> | <b>+0.77839280795065E+00</b> | <b>63.9</b> |
|      | 5/2         | -0.77053705025405E-01        | +0.00000000000000E+00        | 0.6         |
| 5    | -5/2        | -0.49904738934369E-01        | -0.14847094407101E-01        | 0.3         |
|      | -3/2        | +0.61504929572269E-01        | -0.39194722112717E+00        | 15.7        |
|      | <b>-1/2</b> | <b>+0.70627675674899E+00</b> | <b>+0.28400414426367E+00</b> | <b>57.9</b> |
|      | 1/2         | -0.24226806547196E+00        | -0.17475672486025E+00        | 8.9         |
|      | 3/2         | -0.30433019688423E+00        | -0.11656045467349E+00        | 10.6        |
|      | 5/2         | -0.25487536653245E+00        | +0.00000000000000E+00        | 6.5         |
| 6    | -5/2        | +0.24429319651674E+00        | +0.72679344454168E-01        | 6.5         |
|      | -3/2        | -0.32493267253814E+00        | +0.24939273956552E-01        | 10.6        |
|      | -1/2        | +0.28204233776406E+00        | -0.98416706775986E-01        | 8.9         |
|      | <b>1/2</b>  | <b>+0.75793845185729E+00</b> | <b>-0.70813228453789E-01</b> | <b>57.9</b> |
|      | 3/2         | +0.52814956281226E-01        | -0.39321248804111E+00        | 15.7        |
|      | 5/2         | -0.52066486406293E-01        | +0.00000000000000E+00        | 0.3         |

**Table S9** Energies of the lowest KDs for Ce(III) ion in **1** Ce calculated using single\_aniso module together with g-values, transition magnetic moments quantifying probability for the quantum tunnelling of magnetization (QTM) and deviations from the principal magnetisation axes of the first KD.

| KD | $\Delta E$ (cm <sup>-1</sup> ) | $g_{xx}$ | $g_{yy}$ | $g_{zz}$ | QTM                | $\theta$ (°) |
|----|--------------------------------|----------|----------|----------|--------------------|--------------|
| 1  | 0                              | 0.101    | 0.644    | 3.844    | 0.124395289130E+00 | -            |
| 2  | 250.35                         | 1.168    | 1.704    | 2.529    | 0.637899861543E+00 | 11.68        |
| 3  | 620.87                         | 0.013    | 0.498    | 3.574    | 0.755956118440E+00 | 13.96        |



**Table S10** Composition of wave functions of the ground  $J = 5/2$  state of Ce(III) ion for complex **1** Ce obtained from single\_aniso calculations.

| w.f. | $m_J$       | $c_i$                        |                              | Weight (%)  |
|------|-------------|------------------------------|------------------------------|-------------|
|      |             | Real                         | Imag                         |             |
| 1    | -5/2        | +0.14640393950610E+00        | -0.17361859277591E+00        | 5.2         |
|      | -3/2        | +0.94624995867049E-01        | +0.26393102247770E-01        | 1.0         |
|      | -1/2        | +0.59934837968488E-01        | +0.32989210636616E-01        | 0.5         |
|      | 1/2         | -0.81847591502576E-02        | +0.38923755535843E-01        | 0.2         |
|      | 3/2         | +0.17881611475358E-01        | -0.21559889958117E-01        | 0.1         |
|      | <b>5/2</b>  | <b>+0.96525897163323E+00</b> | <b>+0.00000000000000E+00</b> | <b>93.2</b> |
| 2    | <b>-5/2</b> | <b>+0.62225206001825E+00</b> | <b>-0.73792090076975E+00</b> | <b>93.2</b> |
|      | -3/2        | -0.28009438792300E-01        | -0.22840667368285E-03        | 0.1         |
|      | -1/2        | -0.35032708192610E-01        | -0.18835030821922E-01        | 0.2         |
|      | 1/2         | -0.13417277814031E-01        | +0.67085389566463E-01        | 0.5         |
|      | 3/2         | +0.40822804845505E-01        | -0.89353145510913E-01        | 1.0         |
|      | 5/2         | -0.22710686758527E+00        | +0.00000000000000E+00        | 5.2         |
| 3    | -5/2        | +0.10449358504959E-01        | -0.13105831405708E-01        | 0.0         |
|      | <b>-3/2</b> | <b>-0.83526329916726E+00</b> | <b>-0.29632029755061E+00</b> | <b>78.5</b> |
|      | -1/2        | -0.64077623767020E-01        | +0.15365954944560E-01        | 0.4         |
|      | 1/2         | -0.16380988959093E+00        | -0.35075247385192E+00        | 15.0        |
|      | 3/2         | -0.18685765206084E+00        | -0.12048448480915E+00        | 4.9         |
|      | 5/2         | +0.10302050728033E+00        | +0.00000000000000E+00        | 1.1         |
| 4    | -5/2        | +0.64223990130257E-01        | -0.80551252636713E-01        | 1.1         |
|      | -3/2        | +0.22282632142760E-01        | -0.22121432515187E+00        | 4.9         |
|      | -1/2        | +0.17213102593625E+00        | +0.34674470076011E+00        | 15.0        |
|      | 1/2         | +0.51961184707750E-01        | -0.40522705453972E-01        | 0.4         |
|      | <b>3/2</b>  | <b>-0.28901984891574E+00</b> | <b>+0.83781741717610E+00</b> | <b>78.5</b> |
|      | 5/2         | -0.16761619350658E-01        | +0.00000000000000E+00        | 0.0         |
| 5    | -5/2        | -0.85978679764792E-02        | +0.19027868110689E-01        | 0.0         |
|      | -3/2        | +0.63415787371521E-01        | -0.77299075938837E-01        | 1.0         |
|      | <b>-1/2</b> | <b>+0.72055046526156E+00</b> | <b>+0.49613969380034E+00</b> | <b>76.5</b> |
|      | 1/2         | -0.26418212462044E+00        | +0.66292401212274E-01        | 7.4         |
|      | 3/2         | -0.60063354141476E-01        | -0.37557665862125E+00        | 14.5        |
|      | 5/2         | -0.73262735959274E-01        | +0.00000000000000E+00        | 0.5         |
| 6    | -5/2        | +0.30167484721100E-01        | -0.66763398634601E-01        | 0.5         |
|      | -3/2        | +0.31752586834825E+00        | +0.20938661885781E+00        | 14.5        |
|      | -1/2        | +0.16919401047211E+00        | -0.21344850475757E+00        | 7.4         |
|      | <b>1/2</b>  | <b>-0.15542385969867E+00</b> | <b>-0.86092449862328E+00</b> | <b>76.5</b> |
|      | 3/2         | -0.96554458213686E-01        | +0.25960467846139E-01        | 1.0         |
|      | 5/2         | -0.20880208173413E-01        | +0.00000000000000E+00        | 0.0         |

**Table S11** Energies of the lowest KDs for Ce(III) ion in **2** Ce-Zn calculated using single\_aniso module together with g-values, transition magnetic moments quantifying probability for the quantum tunnelling of magnetization (QTM) and deviations from the principal magnetisation axes of the first KD.

| KD | $\Delta E$ (cm <sup>-1</sup> ) | $g_x$ | $g_y$ | $g_z$ | QTM                | $\theta$ (°) |
|----|--------------------------------|-------|-------|-------|--------------------|--------------|
| 1  | 0                              | 0.382 | 0.855 | 3.648 | 0.206389976697E+00 | -            |
| 2  | 357.80                         | 1.026 | 1.712 | 2.580 | 0.643679151676E+00 | 5.92         |
| 3  | 486.70                         | 0.324 | 0.701 | 3.502 | 0.446138807446E+00 | 5.33         |

**Table S12** Composition of wave functions of the ground  $J = 5/2$  state of Ce(III) ion for complex **2** Ce-Zn obtained from single\_aniso calculations.

| w.f. | $m_J$ | $c_i$                        |                              |             |
|------|-------|------------------------------|------------------------------|-------------|
|      |       | Real                         | Imag                         | Weight (%)  |
| 1    | -5/2  | <b>+0.22046303572929E+00</b> | <b>+0.68253315775951E+00</b> | <b>51.4</b> |
|      | -3/2  | +0.56134729276744E-03        | -0.10238399207934E+00        | 1.0         |
|      | -1/2  | +0.25406542049287E-01        | -0.15369447414623E+00        | 2.4         |
|      | 1/2   | +0.62634584079162E-01        | -0.14371310786496E+00        | 2.5         |
|      | 3/2   | -0.13732227414324E+00        | +0.17507982766282E-01        | 1.9         |
|      | 5/2   | <b>+0.63800765888632E+00</b> | <b>+0.00000000000000E+00</b> | <b>40.7</b> |
| 2    | -5/2  | <b>+0.19610460111640E+00</b> | <b>+0.60712169945026E+00</b> | <b>40.7</b> |
|      | -3/2  | +0.25548365506701E-01        | +0.13605593472468E+00        | 1.9         |
|      | -1/2  | -0.11750394437307E+00        | +0.10377558222406E+00        | 2.5         |
|      | 1/2   | +0.13844490572140E+00        | -0.71417727529022E-01        | 2.4         |
|      | 3/2   | -0.97255040881322E-01        | +0.32003969631008E-01        | 1.0         |
|      | 5/2   | <b>-0.71725550673381E+00</b> | <b>+0.00000000000000E+00</b> | <b>51.4</b> |
| 3    | -5/2  | -0.56495394753739E-01        | -0.12596174782859E+00        | 1.9         |
|      | -3/2  | <b>-0.33478800618921E+00</b> | <b>+0.45563312668531E+00</b> | <b>32.0</b> |
|      | -1/2  | +0.20465511169838E+00        | +0.31545484440328E-01        | 4.3         |
|      | 1/2   | <b>-0.11828542989138E+00</b> | <b>-0.52446588937647E+00</b> | <b>28.9</b> |
|      | 3/2   | <b>-0.52544789797018E+00</b> | <b>-0.23029482199939E+00</b> | <b>32.9</b> |
|      | 5/2   | +0.13835112450418E-01        | +0.00000000000000E+00        | 0.0         |
| 4    | -5/2  | -0.56618187435197E-02        | -0.12623555576183E-01        | 0.0         |
|      | -3/2  | <b>-0.42515957334788E+00</b> | <b>-0.38518895824763E+00</b> | <b>32.9</b> |
|      | -1/2  | <b>+0.52694437244812E+00</b> | <b>-0.10670305775315E+00</b> | <b>28.9</b> |
|      | 1/2   | +0.11253515662782E+00        | +0.17382367790692E+00        | 4.3         |
|      | 3/2   | <b>-0.27872562772093E+00</b> | <b>+0.49193147839098E+00</b> | <b>32.0</b> |
|      | 5/2   | -0.13805104722734E+00        | +0.00000000000000E+00        | 1.9         |
| 5    | -5/2  | -0.19405609716046E+00        | +0.87201880667067E-01        | 4.5         |
|      | -3/2  | -0.93701672688782E-01        | -0.45826761118387E+00        | 21.9        |
|      | -1/2  | -0.84035507524611E-01        | +0.33557963764055E-01        | 0.8         |
|      | 1/2   | <b>-0.48443845347757E+00</b> | <b>-0.61347575695997E+00</b> | <b>61.1</b> |
|      | 3/2   | +0.29713229540975E+00        | +0.12025267269595E+00        | 10.3        |
|      | 5/2   | -0.11823420372248E+00        | +0.00000000000000E+00        | 1.4         |
| 6    | -5/2  | +0.10784595508330E+00        | -0.48462120850540E-01        | 1.4         |
|      | -3/2  | +0.22173631777259E+00        | -0.23147637799704E+00        | 10.3        |
|      | -1/2  | <b>+0.19042197484227E+00</b> | <b>-0.75813757943241E+00</b> | <b>61.1</b> |
|      | 1/2   | -0.90406831208341E-01        | +0.38351717762215E-02        | 0.8         |
|      | 3/2   | -0.10236693750976E+00        | -0.45641014104875E+00        | 21.9        |
|      | 5/2   | -0.21274852844486E+00        | +0.00000000000000E+00        | 4.5         |

**Table S13** CAS(8,5)-NEVPT2 transition energies for complex **2** La-Ni.

| Root | Mult | $\Delta E$ (cm <sup>-1</sup> ) |
|------|------|--------------------------------|
| 0    | 3    | 0                              |
| 1    | 3    | 9228.2                         |
| 2    | 3    | 9633.7                         |
| 3    | 3    | 13891.8                        |
| 0    | 1    | 14590.6                        |
| 1    | 1    | 16593.1                        |

|    |   |         |
|----|---|---------|
| 4  | 3 | 17113.7 |
| 5  | 3 | 19414.1 |
| 6  | 3 | 19532.4 |
| 2  | 1 | 24945.9 |
| 3  | 1 | 25399.4 |
| 7  | 3 | 29360.2 |
| 4  | 1 | 29508.8 |
| 6  | 1 | 30096.8 |
| 5  | 1 | 30588.8 |
| 8  | 3 | 31435.1 |
| 9  | 3 | 32093.8 |
| 7  | 1 | 35093.0 |
| 8  | 1 | 35422.9 |
| 9  | 1 | 40915.0 |
| 10 | 1 | 41109.2 |
| 11 | 1 | 41805.2 |
| 12 | 1 | 42156.5 |
| 13 | 1 | 42562.0 |
| 14 | 1 | 67532.4 |

**Table S14** Calculated (CAS(8,5)-NEVPT2) contributions to the SH parameters in **2** La-Ni.

| Root | Mult | $D$ (cm <sup>-1</sup> ) | $E$ (cm <sup>-1</sup> ) |
|------|------|-------------------------|-------------------------|
| 1    | 3    | 22.335                  | 22.577                  |
| 2    | 3    | 21.408                  | -21.400                 |
| 3    | 3    | -30.140                 | 0.174                   |
| 4    | 3    | 0.007                   | 0.002                   |
| 5    | 3    | 0.190                   | -0.190                  |
| 6    | 3    | 0.219                   | 0.227                   |
| 7    | 3    | 0.004                   | -0.004                  |
| 8    | 3    | 0.022                   | -0.021                  |
| 9    | 3    | 0.026                   | 0.027                   |
| 0    | 1    | -0.015                  | -0.012                  |
| 1    | 1    | -0.001                  | 0.001                   |
| 2    | 1    | -7.318                  | -7.359                  |
| 3    | 1    | -7.179                  | 7.176                   |
| 4    | 1    | 11.910                  | -0.020                  |
| 5    | 1    | -0.001                  | -0.001                  |
| 6    | 1    | -0.002                  | -0.002                  |
| 7    | 1    | -0.120                  | 0.049                   |
| 8    | 1    | -0.091                  | -0.029                  |
| 9    | 1    | -0.107                  | 0.122                   |
| 10   | 1    | -0.017                  | 0.074                   |
| 11   | 1    | -0.423                  | 0.419                   |
| 12   | 1    | -0.009                  | -0.412                  |
| 13   | 1    | 1.030                   | -0.187                  |
| 14   | 1    | -0.000                  | -0.000                  |

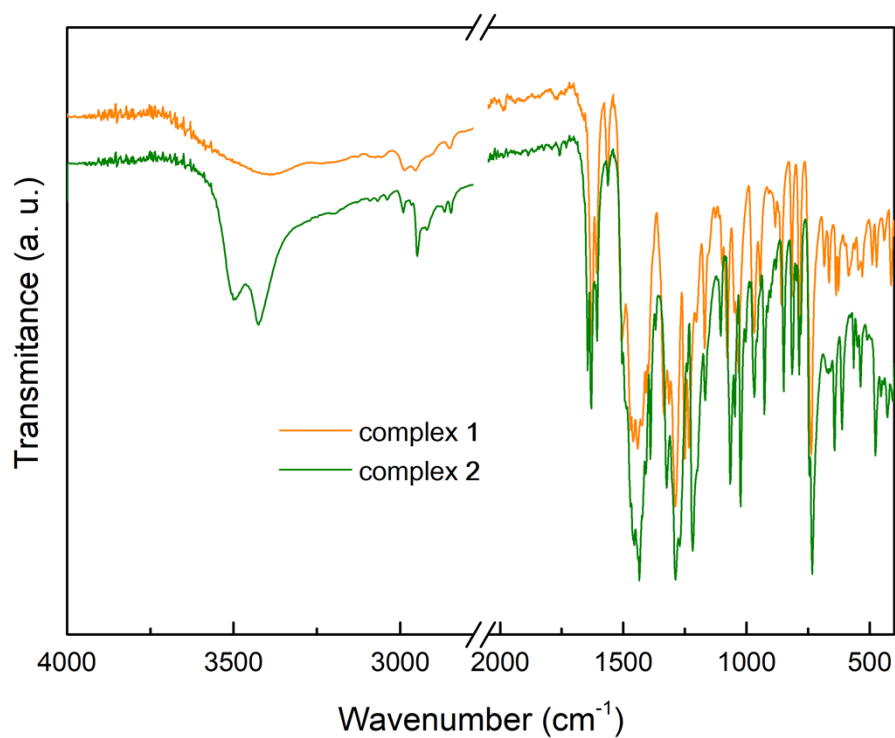

**Figure S1** Comparison of the IR spectra of two Ni(II)/Ce(III) complexes:  $[\text{Ni}(\text{o-van-dap})\text{Ce}(\text{H}_2\text{O})(\text{NO}_3)_3]$  (**1**) and  $[\text{Ni}(\text{H}_2\text{O})_2(\text{o-van-dmdap})\text{Ce}(\text{NO}_3)_3]$  (**2**).

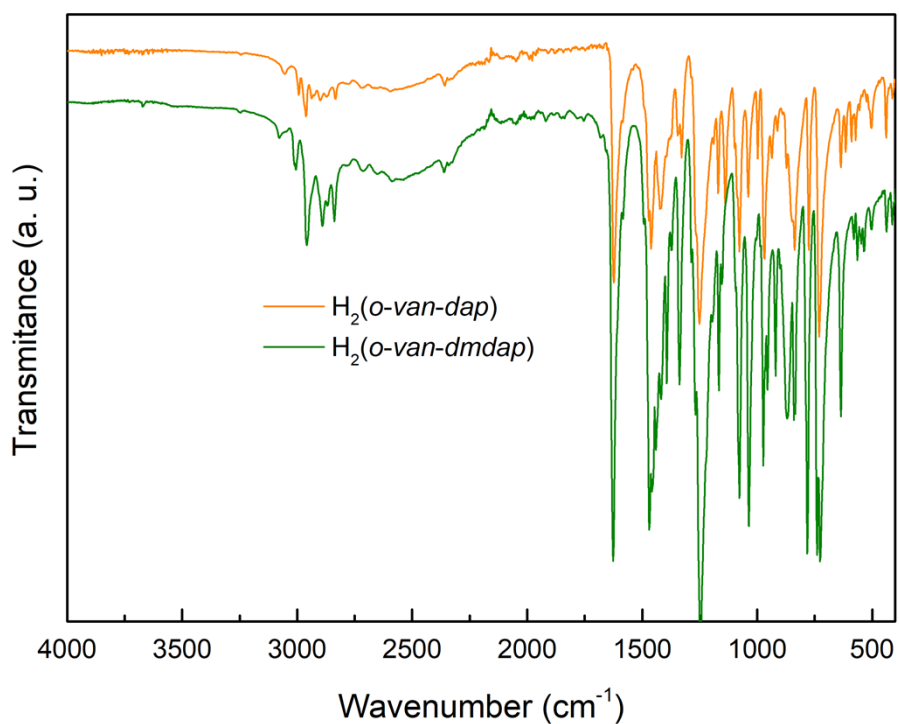

**Figure S2** Comparison of the IR spectra of the Schiff base ligands.

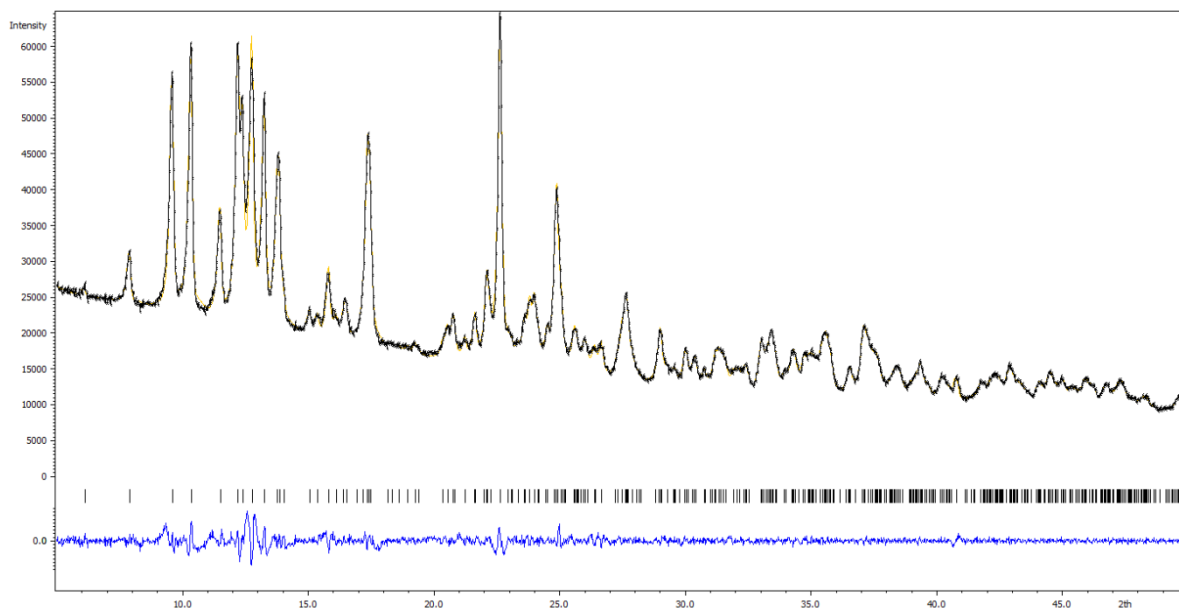

**Figure S3** LeBail refinement of the measured powder diffraction pattern of complex **1**. Yellow line represents the refined pattern, black line represents the measured powder diffraction pattern, while the blue line shows the difference between the observed and calculated intensities. The refined cell lengths for triclinic  $P-1$  space group are  $a = 7.9163(11)$ ,  $b = 11.5406(11)$ ,  $c = 14.5707(13)$  Å and  $V = 1292.1(2)$  Å<sup>3</sup>, the values from appropriate low-temperature (100 K) CIF file are:  $a = 7.8894(2)$ ,  $b = 11.3473(2)$ ,  $c = 14.4942(2)$  Å and  $V = 1265.50(4)$  Å<sup>3</sup>. We note that the experimental powder diffraction data were collected at room temperature. The resulting R values are  $R(p) = 0.0176$ ,  $R(wp) = 0.0235$  and goodness of fit is 3.31.

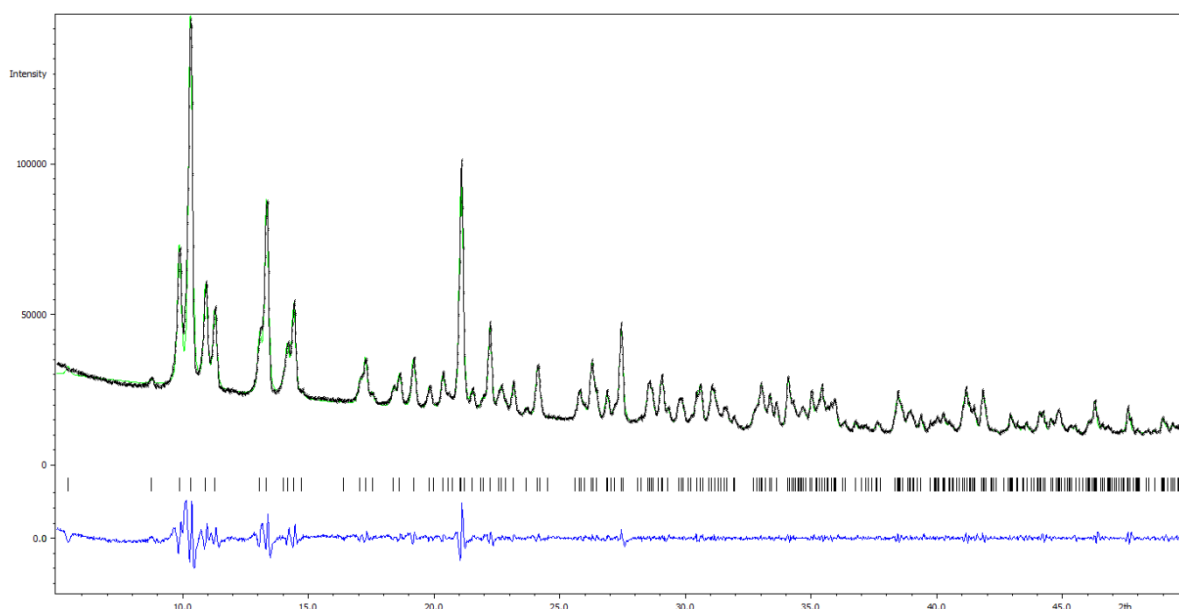

**Figure S4** LeBail refinement of the measured powder diffraction pattern of complex **2**. Green line represents the refined pattern, black line represents the measured powder diffraction pattern, while the blue line shows the difference between the observed and calculated intensities. The refined cell lengths for monoclinic  $P2_1$  space group are  $a = 8.9526(12)$ ,  $b = 16.1888(10)$ ,  $c = 10.1005(11)$  Å and  $V = 1463.6(2)$  Å<sup>3</sup>, the values from appropriate low-temperature (100 K) CIF file are:  $a = 8.8746(10)$ ,  $b =$

16.048(2),  $c = 10.0771(10)$  Å and  $V = 1434.43(3)$  Å<sup>3</sup>. We note that the experimental powder diffraction data were collected at room temperature. The resulting R values are  $R(p) = 0.0656$ ,  $R(wp) = 0.0308$  and goodness of fit is 4.41.

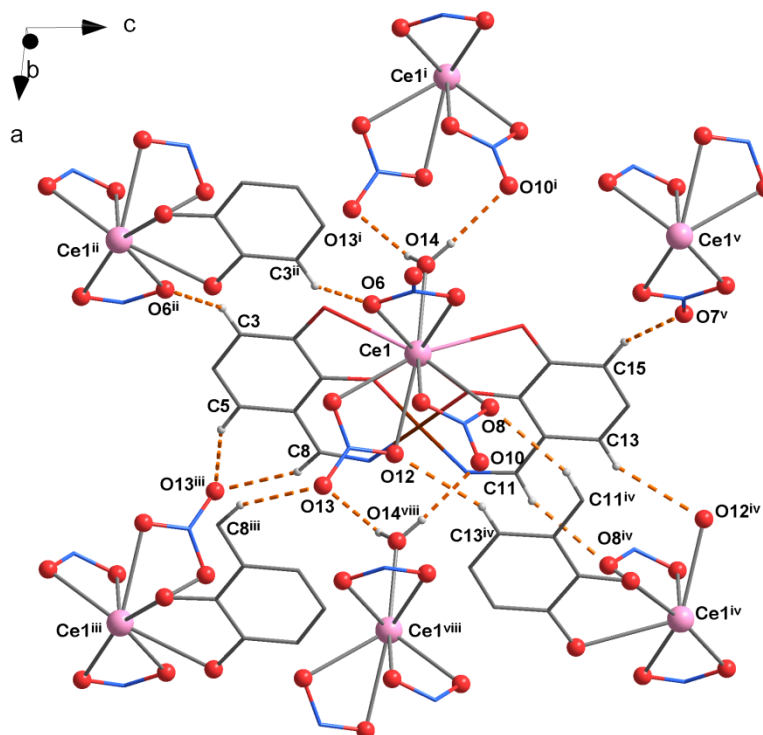

**Figure S5** View on the O-H $\cdots$ O and weak C-H $\cdots$ O type hydrogen bonds (orange dashed lines) in **1**. Only atoms relevant for hydrogen bonding interactions are shown. Symmetry codes: i:  $-1 + x, y, z$ ; ii:  $1 - x, -y, -z$ ; iii:  $2 - x, 1 - y, -z$ ; iv:  $2 - x, 1 - y, 1 - z$ ; v:  $1 - x, -y, 1 - z$ ; vi:  $1 - x, 1 - y, 1 - z$ ; viii:  $1 - x, 1 - y, -z$ ; viii:  $1 + x, y, z$ .

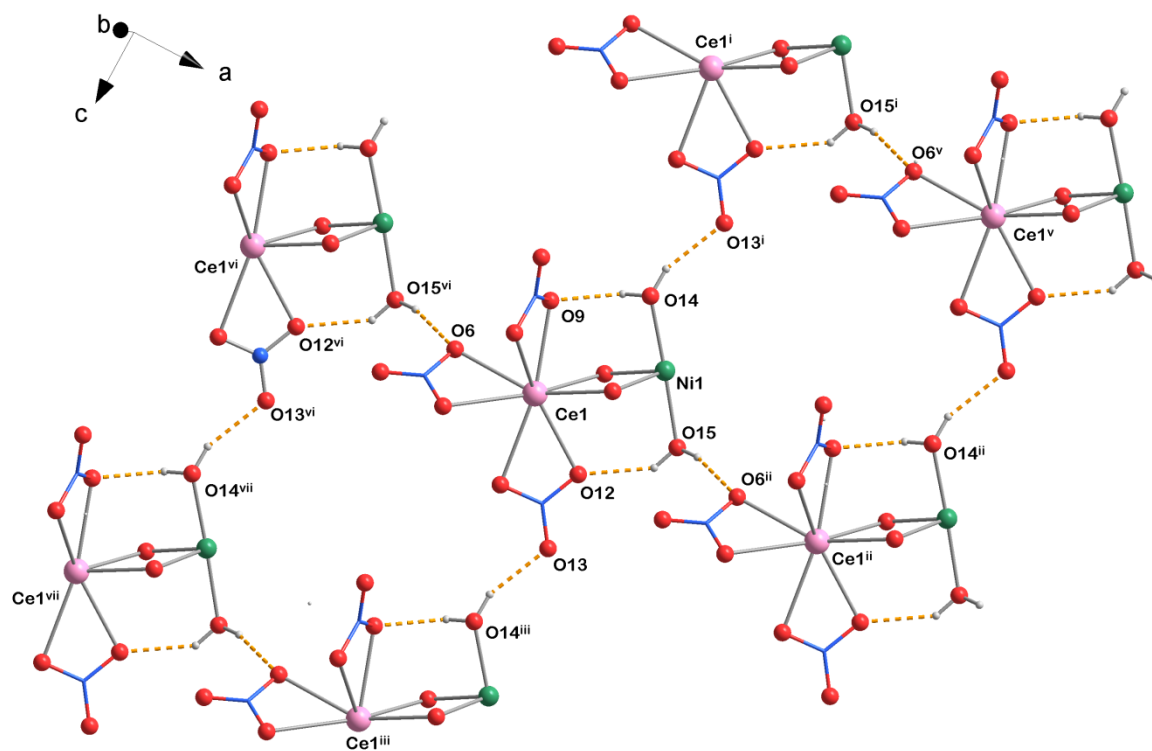

**Figure S6** View on the O-H $\cdots$ O type intramolecular and intermolecular hydrogen bonds (orange dashed lines) in **1**. Only atoms relevant for hydrogen bonding interactions are shown. Symmetry codes: i:  $x, y, -1 + z$ ; ii:  $1 + x, y, z$ ; iii:  $x, y, 1 + z$ ; iv:  $1 - x, -1/2 + y, 1 - z$ ; v:  $1 + x, y, -1 + z$ ; vi:  $-1 + x, y, z$ ; vii:  $-1 + x, y, 1 + z$ .

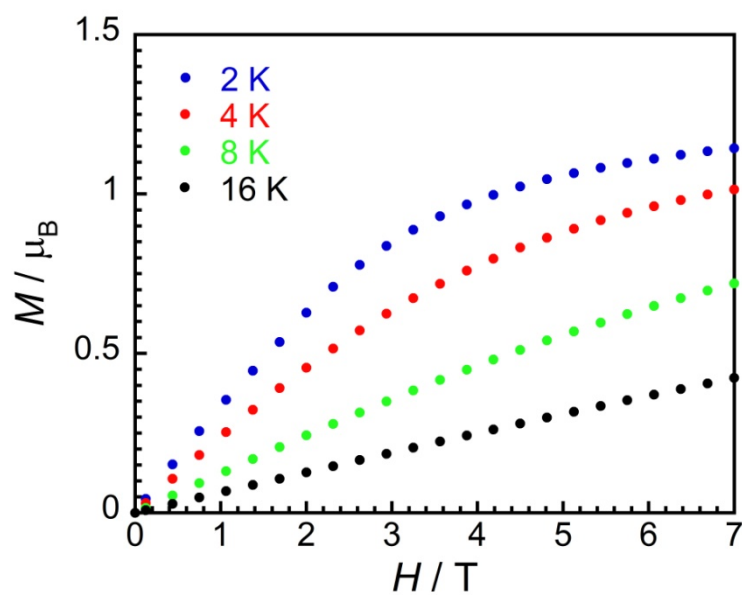

**Figure S7** Field dependent magnetization curves at different temperatures for **1**.

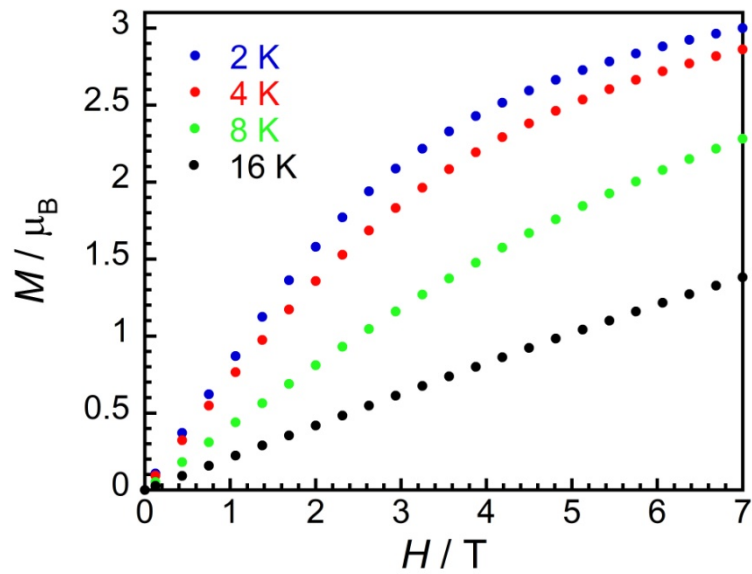

**Figure S8** Field dependent magnetization curves at different temperatures for **2**.

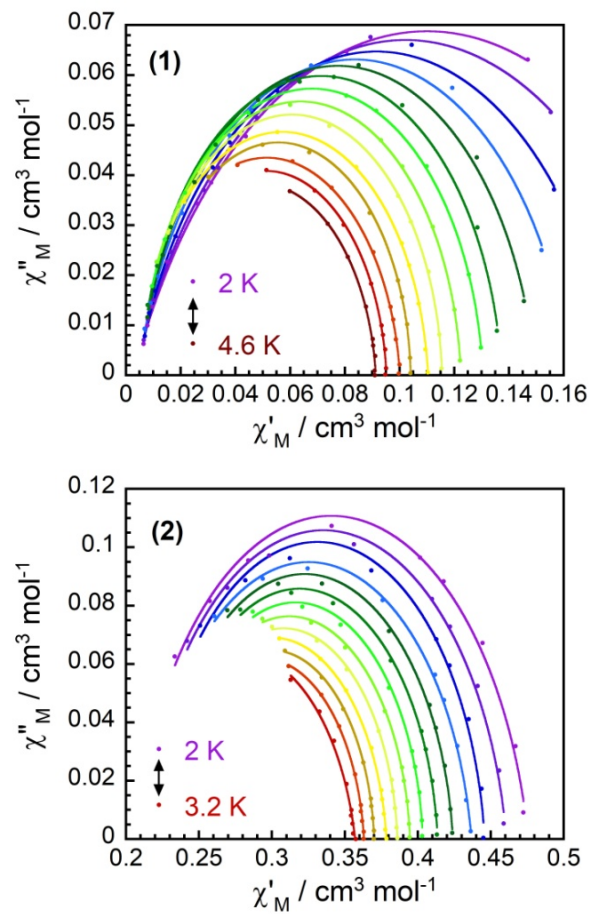

**Figure S9** Cole-Cole plots for **1** and **2**. The experimental data are denoted by circles; solid lines represent the best fit to the Debye model.



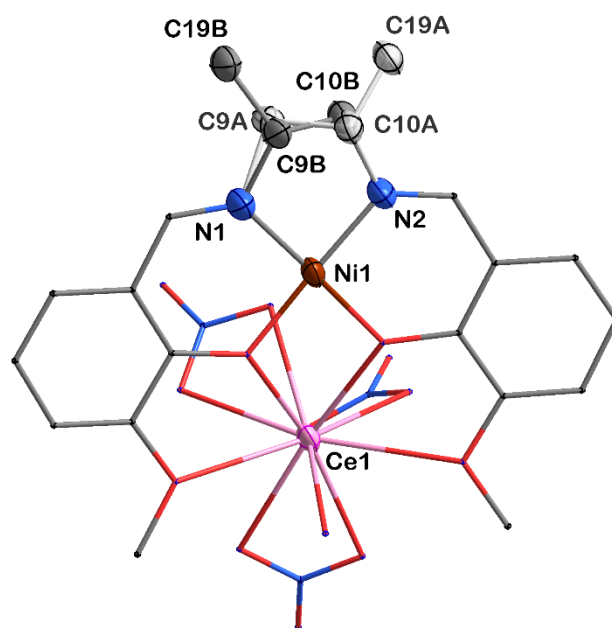

**Figure S10** View on the disordered 1,2-diaminopropane fragment in the complex **1** (C9A/C9B, C10A/C10B a C19A/C19B) with occupation factors in 0.38 : 0.62 *ratio*. The thermal ellipsoids for disordered C atoms and appropriate N atoms of the fragment, Ni and Ce central atoms were drawn with 50 % probability level. The rest of the molecule is depicted in wire and stick model. Hydrogen atoms are omitted for clarity.

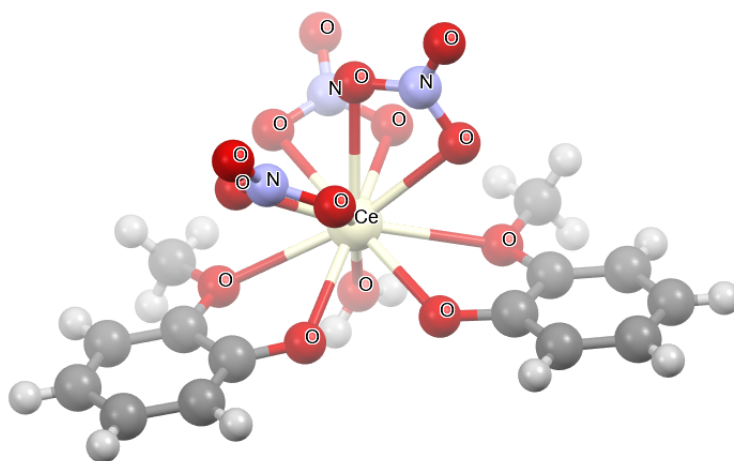

**Figure S11** Truncated molecular structure of the complex **1** ( $1 \text{ Ce} = [\text{CeL}_2(\text{NO}_3)_3\text{H}_2\text{O}]^{2-}$ ).

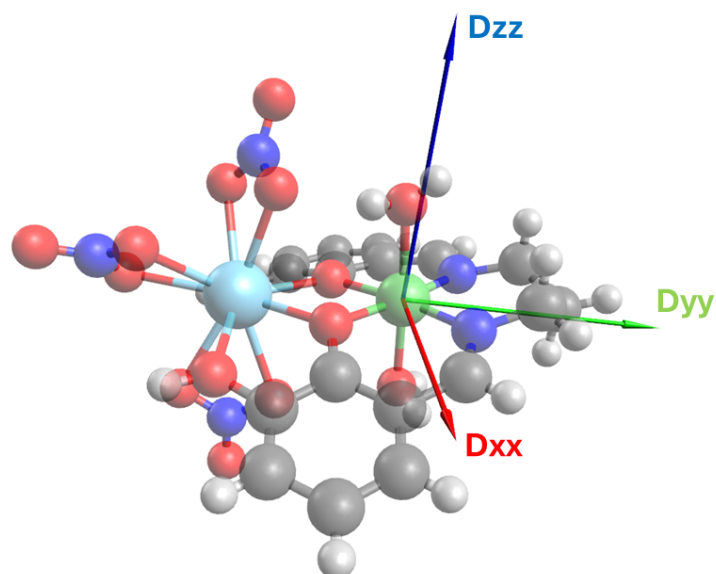

**Figure S12** Orientation of the principal axes of the  $D$ -tensor in structure **2** La-Ni.

## References

- [1] A. Vráblová, M. Tomás, L. R. Falvello, L. Dlháň, J. Titiš, J. Černák, R. Boča, *Dalton Trans.*, 2019, **48**, 13943. <https://doi.org/10.1039/c9dt02122a>.
- [2] T. D. Pasatoiu, J.-P. Sutter, A. M. Madalan, F. Z. Ch. Fellah, C. Duhayon, M. Andruh, *Inorg. Chem.*, 2011, **50**, 5890. <https://doi.org/10.1021/ic2004276>.
- [3] A. Jana, S. Majumder, L. Carrella, M. Nayak, T. Weyhermueller, S. Dutta, D. Schollmeyer, E. Rentschler, R. Koner, S. Mohanta, *Inorg. Chem.*, 2010, **49**, 9012. <https://doi.org/10.1021/ic101445n>.
- [4] J. S. Elias, M. Risch, L. Giordano, A. N. Mansour, Y. Shao-Horn, *J. Am. Chem. Soc.*, 2014, **136**, 17193. <https://doi.org/10.1021/ja509214d>.
- [5] H.-R. Wen, S.-J. Liu, X.-R. Xie, J. Bao, C.-M. Liu, J.-L. Chen, *Inorg. Chim. Acta*, 2015, **435**, 274. <http://dx.doi.org/10.1016/j.ica.2015.07.009>.
- [6] R. Koner, H.-H. Lin, H.-H. Wei, S. Mohanta, *Inorg. Chem.*, 2005, **44**, 3524. <https://doi.org/10.1021/ic048196h>.
- [7] S. A. Güngör, M. Kose, *J. Mol. Struct.*, 2017, **1150**, 274. <https://doi.org/10.1016/j.molstruc.2017.08.091>.
- [8] S. Ghosh, A. Ghosh, *Inorg. Chim. Acta*, 2016, **442**, 64. <https://doi.org/10.1016/j.ica.2015.11.029>.
- [9] B. Cristóvão, J. Klak, R. Pelka, B. Mirosław, Z. Hnatejko, *Polyhedron*, 2014, **68**, 180. <http://dx.doi.org/10.1016/j.poly.2013.10.019>.
- [10] Y. Sui, R.-H. Hu, D.-S. Liu, Q. Wu, *Inorg. Chem. Commun.*, 2011, **14**, 396. <https://doi.org/10.1016/j.inoche.2010.12.010>.
- [11] H. Nagae, K. Sakamoto, S. Fujiwara, T. Schindler, Y. Kon, K. Sato, J. Okuda, K. Mashima, *Chem. Commun.*, 2021, **57**, 11169. <https://doi.org/10.1039/D1CC04540G>.
- [12] M. Llunell, D. Casanova, J. Cirera, P. Alemany, S. Alvarez, SHAPE Program, version 2.1, Universitat de Barcelona (2013).
